# Supplementary material for: Nano LC-MS using capillary columns enables accurate quantification of modified ribonucleosides at low femtomol levels
Source: PubMed Central journal article supplement — RNA. 2018 Oct;24(10):1403–17. doi: 10.1261/rna.065482.117 (PMC6140458; doi:10.1261/rna.065482.117), 2018-10
Supplement: supp_065482.117_Supplemental_Figure1.pdf [file supp_065482.117_Supplemental_Figure1.pdf]

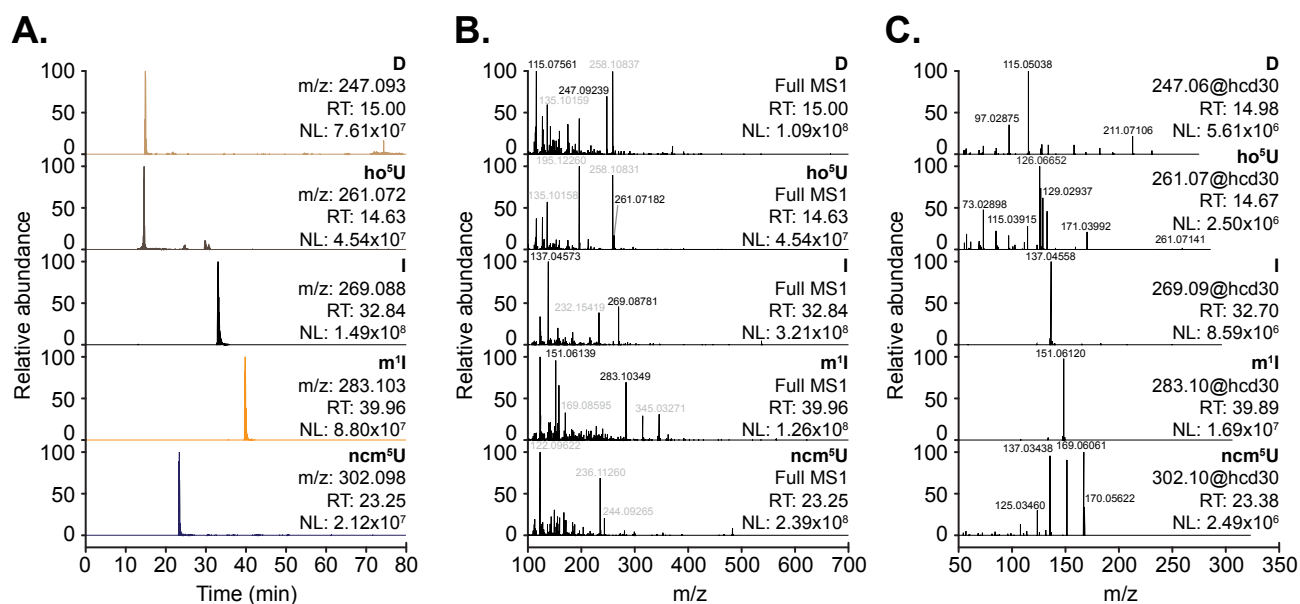

**Supplemental Figure 1.** Some additional nucleoside modifications detected in yeast bulk tRNA digest. (A) Representative extracted ion chromatograms (XIC) for dihydrouridine (D), 5-hydroxyuridine (ho<sup>5</sup>U), inosine (I), 1-methylinosine (m<sup>1</sup>I), and 5-carbamoylmethyluridine (ncm<sup>5</sup>U) analyzed on a nanoflow capillary column packed with PGC-B. (B) MS1 spectra (m/z=100-700) and (C) MS2 fragmentation spectra (hcd=30) recorded at the corresponding retention times and m/z values for the nucleosides analyzed in (A). NL: Normalized target level.
