# Supplementary material for: Nano LC-MS using capillary columns enables accurate quantification of modified ribonucleosides at low femtomol levels
Source: PubMed Central journal article supplement — RNA. 2018 Oct;24(10):1403–17. doi: 10.1261/rna.065482.117 (PMC6140458; doi:10.1261/rna.065482.117), 2018-10
Supplement: supp_065482.117_Supplemental_Figure2.pdf [file supp_065482.117_Supplemental_Figure2.pdf]

### A. Manual quantification with Xcalibur™

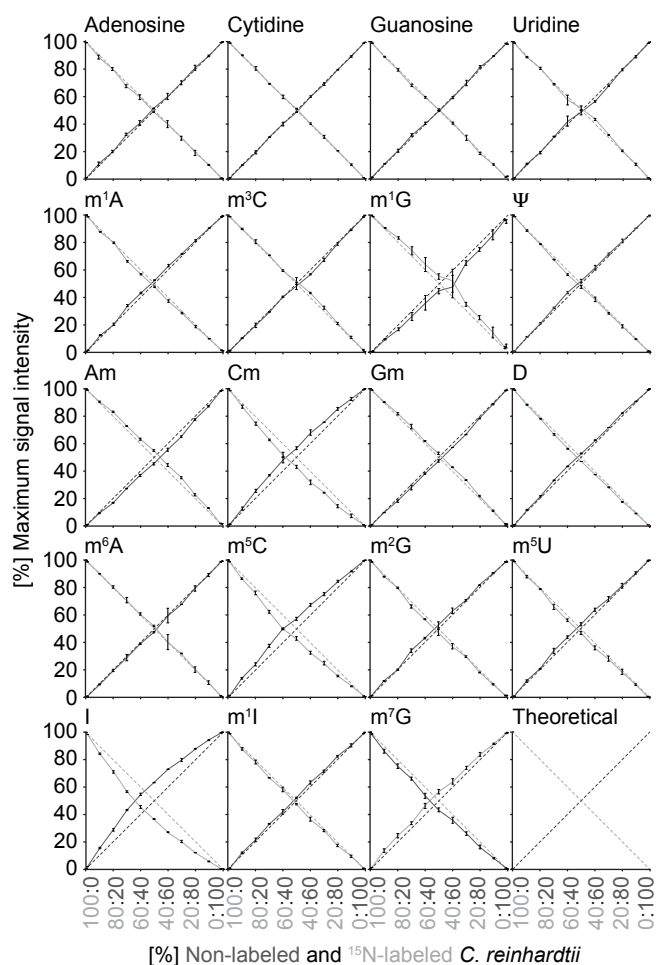

### B. Semi-automated quantification with pyQms

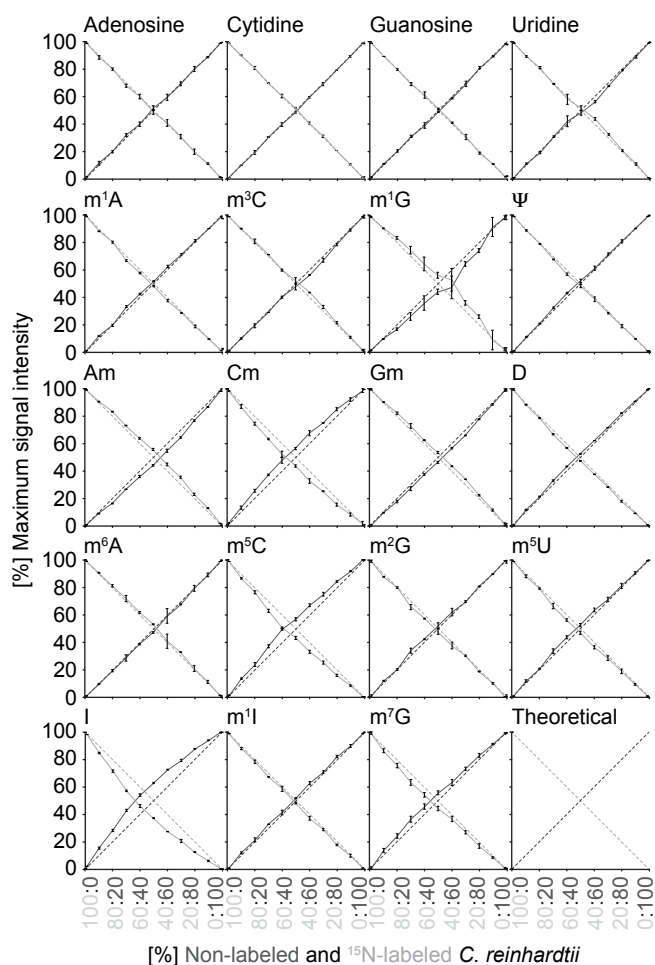

**Supplemental Figure 2.** Comparison between (A) manual and (B) semi-automated maximum peak intensity quantification of cross-diluted non-labeled and  $^{15}\text{N}$ -labeled enzymatic digests of bulk tRNA isolated from *Chlamydomonas reinhardtii*. Cross-dilution plots ( $n=3$ ) for 19 nucleosides where the maximum peak intensity for both the non-labeled (solid dark gray line) and  $^{15}\text{N}$ -labeled (solid light gray line) isoform could be determined. The dotted lines represent the expected ratio of  $^{15}\text{N}$ -labeled (light gray) vs. non-labeled (dark gray) material present in the sample (highlighted in panel “Theoretical”).
