# Supplementary material for: Nano LC-MS using capillary columns enables accurate quantification of modified ribonucleosides at low femtomol levels
Source: PubMed Central journal article supplement — RNA. 2018 Oct;24(10):1403–17. doi: 10.1261/rna.065482.117 (PMC6140458; doi:10.1261/rna.065482.117), 2018-10
Supplement: supp_065482.117_Supplemental_Figure3.pdf [file supp_065482.117_Supplemental_Figure3.pdf]

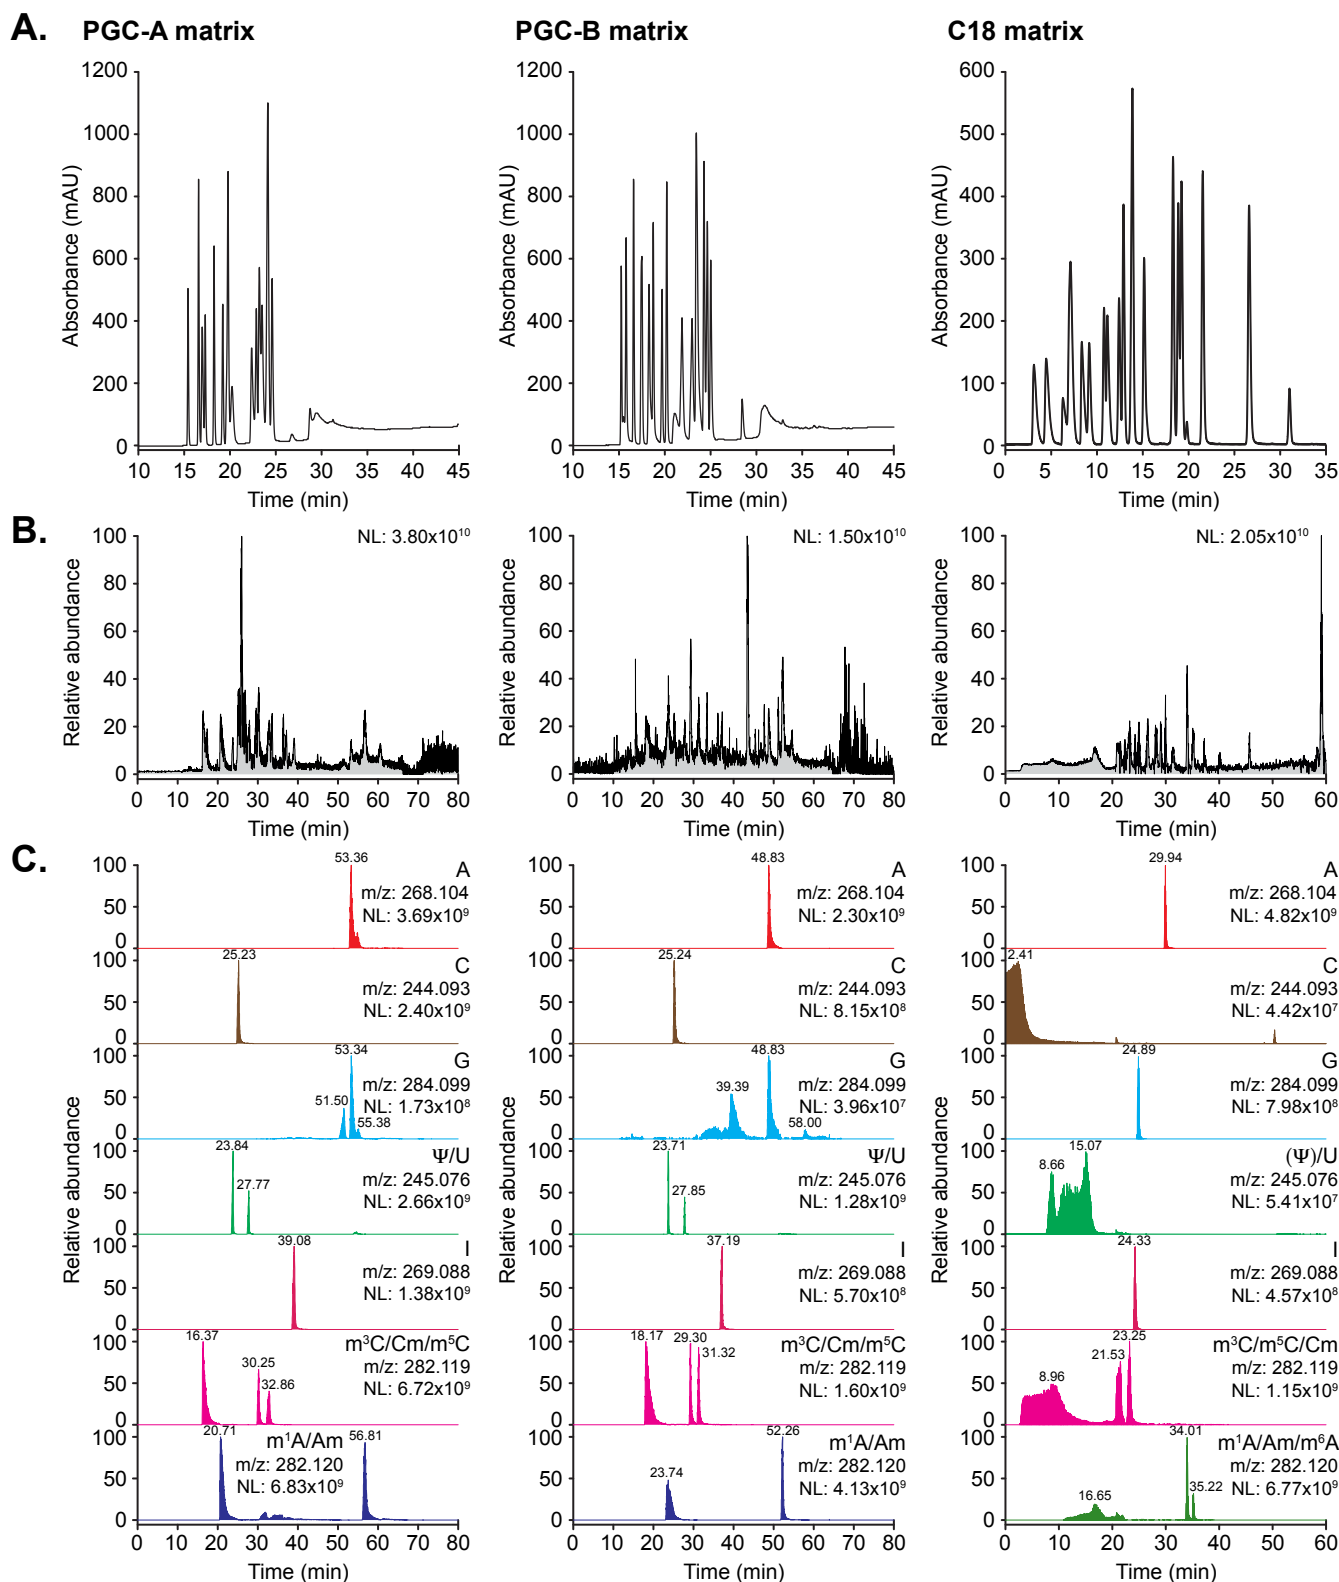

**Supplemental Figure 3. Ribonucleoside separation is readily achieved with linear gradients.** (A) Representative chromatograms ( $A_{254nm}$ -trace) obtained on PGC-A (left panel), PGC-B (middle panel), and C18 (right panel) for the separation of 20 modified ribonucleosides with linear non-optimized gradients (0-100% ACN for PGC, 0-40% ACN for C18) in microbore columns. (B) Total ion chromatograms (TICs) of 100ng of either Limited Standard Mix (LSM) analyzed on PGC-A (left panel) and PGC-B (middle panel) or Complete Standard Mix (CSM) analyzed on C18 (right panel) capillary nanoflow columns with ACN as the mobile phase. (C) Extracted ion chromatograms (XICs) of adenosine, cytidine, guanosine, pseudouridine ( $\Psi$ ), uridine, inosine (I), methylated cytidines ( $m^3C$ , Cm,  $m^5C$ ), and methylated adenosines ( $m^1A$ , Am [ $m^6A$ ; CSM only]). NL: Normalized target level.
