# Supplementary material for: Nano LC-MS using capillary columns enables accurate quantification of modified ribonucleosides at low femtomol levels
Source: PubMed Central journal article supplement — RNA. 2018 Oct;24(10):1403–17. doi: 10.1261/rna.065482.117 (PMC6140458; doi:10.1261/rna.065482.117), 2018-10
Supplement: supp_065482.117_Supplemental_Table_1_.pdf [file supp_065482.117_Supplemental_Table_1_.pdf]

**Supplemental Table 1: Ribonucleoside standards used in this study**

| <b>Limited Standard Mix</b>    |                       |              |               |                  |
|--------------------------------|-----------------------|--------------|---------------|------------------|
| Nucleoside modification:       |                       | Monoisotopic | Amount (1 ml) |                  |
| Full name                      | Abbrev.               | mass         | in nmol       | in $\mu\text{g}$ |
| Adenosine                      | A                     | 268.10403    | 186.49        | 50               |
| 1-methyladenosine              | m <sup>1</sup> A      | 282.11968    | 177.23        | 50               |
| 2'-O-methyladenosine           | Am                    | 282.11968    | 177.23        | 50               |
| Cytidine                       | C                     | 244.09280    | 204.84        | 50               |
| 2'-O-methylcytidine            | Cm                    | 258.10845    | 193.72        | 50               |
| 3-methylcytidine               | m <sup>3</sup> C      | 258.10845    | 193.72        | 50               |
| 5-methylcytidine               | m <sup>5</sup> C      | 258.10845    | 193.72        | 50               |
| N <sup>4</sup> -acetylcytidine | ac <sup>4</sup> C     | 286.10336    | 174.76        | 50               |
| Guanosine                      | G                     | 284.09895    | 176.00        | 50               |
| 1-methylguanosine              | m <sup>1</sup> G      | 298.11460    | 167.72        | 50               |
| 2-methylguanosine              | m <sup>2</sup> G      | 298.11460    | 167.72        | 50               |
| 2'-O-methylguanosine           | Gm                    | 298.11460    | 167.72        | 50               |
| 7-methylguanosine              | m <sup>7</sup> G      | 298.11460    | 167.72        | 50               |
| Uridine                        | U                     | 245.07681    | 204.02        | 50               |
| 2'-O-methyluridine             | Um                    | 259.09246    | 192.98        | 50               |
| 2-thiouridine                  | s <sup>2</sup> U      | 261.05397    | 191.53        | 50               |
| 5-methyluridine                | m <sup>5</sup> U      | 259.09246    | 192.98        | 50               |
| Pseudouridine                  | $\Psi$                | 245.07681    | 204.02        | 50               |
| 1-methylpseudouridine          | m <sup>1</sup> $\Psi$ | 259.09246    | 192.98        | 50               |
| Inosine                        | I                     | 269.08805    | 185.81        | 50               |

  

| <b>Complex Standard Mix (in addition to above)</b> |                                   |              |               |                  |
|----------------------------------------------------|-----------------------------------|--------------|---------------|------------------|
| Nucleoside modification:                           |                                   | Monoisotopic | Amount (1 ml) |                  |
| Full name                                          | Abbrev.                           | mass         | in nmol       | in $\mu\text{g}$ |
| N <sup>6</sup> -methyladenosine                    | m <sup>6</sup> A                  | 282.11968    | 177.23        | 50               |
| N <sup>2</sup> ,N <sup>2</sup> -dimethylguanosine  | m <sup>2,2</sup> G                | 312.13025    | 160.19        | 50               |
| 5-carbamoylmethyluridine                           | ncm <sup>5</sup> U                | 302.09828    | 165.51        | 50               |
| 5-carbamoylmethyl-2-thiouridine                    | ncm <sup>5</sup> s <sup>2</sup> U | 318.07543    | 157.20        | 50               |
| 5-carboxymethyluridine                             | cm <sup>5</sup> U                 | 303.08229    | 164.97        | 50               |
| 5-carboxymethyl-2-thiouridine                      | cm <sup>5</sup> s <sup>2</sup> U  | 319.05945    | 156.71        | 50               |
| 5-hydroxyuridine                                   | ho <sup>5</sup> U                 | 261.07173    | 191.52        | 50               |
| 5-methoxycarbonylmethyluridine                     | mcm <sup>5</sup> U                | 317.09794    | 157.68        | 50               |
| 5-methoxycarbonylmethyl-2-thiouridine              | mcm <sup>5</sup> s <sup>2</sup> U | 333.07510    | 150.12        | 50               |
| 5-methyl-2-thiouridine                             | m <sup>5</sup> s <sup>2</sup> U   | 275.06962    | 181.77        | 50               |
| 2'-O-methylinosine                                 | Im                                | 283.10370    | 176.61        | 50               |
