# Supplementary material for: Nano LC-MS using capillary columns enables accurate quantification of modified ribonucleosides at low femtomol levels
Source: PubMed Central journal article supplement — RNA. 2018 Oct;24(10):1403–17. doi: 10.1261/rna.065482.117 (PMC6140458; doi:10.1261/rna.065482.117), 2018-10
Supplement: supp_065482.117_Supplemental_Table_2_.pdf [file supp_065482.117_Supplemental_Table_2_.pdf]

**Supplemental Table 2. Chromatographic performance of PGC materials in capillary column format****PGC-A matrix**

| Nucleoside                     | Retention time (min) |       |       | Peak width (min)   |                   | f (min) | Symmetry factor (S) | Theoretical plates (N) |
|--------------------------------|----------------------|-------|-------|--------------------|-------------------|---------|---------------------|------------------------|
|                                | Apex                 | Start | Stop  | W <sub>0.05h</sub> | W <sub>0.5h</sub> |         |                     |                        |
| Adenosine                      | 46.13                | 45.57 | 48.02 | 1.62               | 0.43              | 0.41    | 1.976               | 63759                  |
| Cytidine                       | 20.92                | 20.56 | 23.10 | 0.96               | 0.31              | 0.30    | 1.600               | 25230                  |
| Guanosine                      | 46.13                | 17.70 | 74.63 | 2.20               | 0.67              | 0.59    | 1.864               | 26262                  |
| Pseudouridine                  | 18.98                | 18.36 | 20.93 | 0.55               | 0.28              | 0.27    | 1.019               | 25456                  |
| Uridine                        | 22.98                | 20.93 | 25.14 | 0.86               | 0.34              | 0.34    | 1.265               | 25308                  |
| Inosine                        | 32.56                | 31.86 | 35.70 | 0.98               | 0.52              | 0.51    | 0.961               | 21721                  |
| N <sup>4</sup> -acetylcytidine | 52.66                | 51.26 | 58.01 | 1.83               | 1.17              | 0.73    | 1.253               | 11223                  |
| 1-methyladenosine              | 16.70                | 16.23 | 25.05 | 3.79               | 1.48              | 0.27    | 7.019               | 705                    |
| 2'-O-methyladenosine           | 47.91                | 47.35 | 52.64 | 1.78               | 0.48              | 0.28    | 3.179               | 55192                  |

**PGC-B matrix**

| Nucleoside                     | Retention time (min) |       |       | Peak width (min)   |                   | f (min) | Symmetry factor (S) | Theoretical plates (N) |
|--------------------------------|----------------------|-------|-------|--------------------|-------------------|---------|---------------------|------------------------|
|                                | Apex                 | Start | Stop  | W <sub>0.05h</sub> | W <sub>0.5h</sub> |         |                     |                        |
| Adenosine                      | 43.01                | 42.42 | 48.12 | 1.61               | 0.40              | 0.43    | 1.872               | 64051                  |
| Cytidine                       | 19.94                | 19.52 | 21.48 | 0.60               | 0.29              | 0.32    | 0.937               | 26192                  |
| Guanosine                      | 38.20                | 18.08 | 65.74 | 1.47               | 0.48              | 0.40    | 1.837               | 35088                  |
| Pseudouridine                  | 18.73                | 18.27 | 19.76 | 0.52               | 0.25              | 0.32    | 0.812               | 31096                  |
| Uridine                        | 23.15                | 22.78 | 25.70 | 0.69               | 0.33              | 0.27    | 1.278               | 27264                  |
| Inosine                        | 31.24                | 30.65 | 34.88 | 0.95               | 0.41              | 0.46    | 1.033               | 32164                  |
| N <sup>4</sup> -acetylcytidine | 49.26                | 48.60 | 52.89 | 1.12               | 0.60              | 0.45    | 1.244               | 37342                  |
| 1-methyladenosine              | 13.67                | 13.17 | 21.86 | 1.15               | 0.28              | 0.12    | 4.792               | 13205                  |
| 2'-O-methyladenosine           | 44.91                | 40.44 | 57.36 | 1.51               | 0.40              | 0.43    | 1.756               | 69835                  |

**C18 matrix**

| Nucleoside                     | Retention time (min) |       |       | Peak width (min)   |                   | f (min) | Symmetry factor (S) | Theoretical plates (N) |
|--------------------------------|----------------------|-------|-------|--------------------|-------------------|---------|---------------------|------------------------|
|                                | Apex                 | Start | Stop  | W <sub>0.05h</sub> | W <sub>0.5h</sub> |         |                     |                        |
| Adenosine                      | 34.18                | 33.75 | 35.15 | 0.68               | 0.30              | 0.43    | 1.133               | 71914                  |
| Cytidine                       | 8.49                 | 0.00  | 25.13 | 14.56              | 10.62             | 8.49    | 0.857               | 4                      |
| Guanosine                      | 27.39                | 26.77 | 29.06 | 0.83               | 0.42              | 0.35    | 1.186               | 23561                  |
| Pseudouridine*                 | 17.96                | 13.82 | 18.95 | 4.16               | 2.20              | 3.20    | 0.650               | 369                    |
| Uridine*                       | 20.85                | 18.95 | 24.37 | 2.64               | 1.74              | 1.87    | 0.706               | 795                    |
| Inosine                        | 26.48                | 25.92 | 28.01 | 0.91               | 0.54              | 0.39    | 1.167               | 13322                  |
| N <sup>4</sup> -acetylcytidine | 32.44                | 32.00 | 33.18 | 0.58               | 0.23              | 0.27    | 1.074               | 110209                 |
| 1-methyladenosine              | 21.52                | 20.07 | 24.73 | 2.80               | 1.18              | 1.26    | 1.111               | 1843                   |
| 2'-O-methyladenosine           | 39.36                | 38.84 | 40.46 | 0.67               | 0.28              | 0.29    | 1.155               | 109472                 |

\*Pseudouridine and uridine are not baseline separated on the C18 matrix.
