# Supplementary material for: Nano LC-MS using capillary columns enables accurate quantification of modified ribonucleosides at low femtomol levels
Source: PubMed Central journal article supplement — RNA. 2018 Oct;24(10):1403–17. doi: 10.1261/rna.065482.117 (PMC6140458; doi:10.1261/rna.065482.117), 2018-10
Supplement: supp_065482.117_Supplemental_Table_3_.pdf [file supp_065482.117_Supplemental_Table_3_.pdf]

**Supplemental Table 3. LoD/LoQ and linear regression values for CSM ribonucleosides**

| Nucleoside                                        | PGC-B matrix       |                | C18 matrix         |                |
|---------------------------------------------------|--------------------|----------------|--------------------|----------------|
|                                                   | LoD/<br>LoQ        | R <sup>2</sup> | LoD/<br>LoQ        | R <sup>2</sup> |
| Adenosine                                         | 0.004              | <u>0.998</u>   | 0.050              | <u>0.998</u>   |
| Cytidine                                          | 0.050              | <b>0.995</b>   | 0.004              | 0.993          |
| Guanosine                                         | 5x10 <sup>-4</sup> | 0.992          | 0.020              | <b>0.999</b>   |
| Uridine                                           | 0.020              | 0.991          | 0.004              | <b>0.999</b>   |
| 1-methyladenosine                                 | 0.050              | 0.980          | 0.200              | <b>0.993</b>   |
| 2'-O-methyladenosine                              | 0.050              | 0.991          | 0.100              | <b>0.998</b>   |
| N <sup>6</sup> -methyladenosine                   | 0.010              | <b>0.995</b>   | 0.100              | 0.991          |
| 2'-O-methylcytidine                               | 0.010              | 0.991          | 0.100              | <b>0.999</b>   |
| 3-methylcytidine                                  | 0.200              | 0.988          | 0.200              | <b>0.997</b>   |
| 5-methylcytidine                                  | 0.200              | 0.992          | 0.010              | <b>0.999</b>   |
| N <sup>4</sup> -acetylcytidine                    | 0.500              | 0.997          | 0.200              | <b>0.998</b>   |
| 2'-O-methylguanosine                              | n/a                | n/a            | 0.200              | <b>0.996</b>   |
| N-methylguanosine                                 | 0.004              | <b>0.999</b>   | 0.200              | 0.997          |
| N <sup>2</sup> ,N <sup>2</sup> -dimethylguanosine | 0.025              | 0.987          | 0.200              | <b>0.999</b>   |
| 2'-O-methyluridine                                | 0.200              | 0.992          | 0.100              | <b>0.999</b>   |
| 2-thiouridine                                     | 0.160              | 0.972          | 0.010              | <b>0.999</b>   |
| 5-carbamoylmethyluridine                          | 0.100              | <b>0.996</b>   | 0.050              | 0.995          |
| 5-carbamoylmethyl-2-thiouridine                   | 0.040              | 0.969          | 1.000              | <b>0.999</b>   |
| 5-carboxymethyluridine                            | 0.250              | 0.994          | 0.100              | <b>0.998</b>   |
| 5-carboxymethyl-2-thiouridine                     | 0.080              | 0.969          | 0.050              | <b>0.997</b>   |
| 5-hydroxyuridine                                  | 0.050              | <b>0.988</b>   | 8x10 <sup>-5</sup> | 0.979          |
| 5-methoxycarbonylmethyluridine                    | 1.000              | 0.996          | 0.100              | <b>0.999</b>   |
| 5-methoxycarbonylmethyl-2-thiouridine             | 0.640              | 0.960          | 0.500              | <b>0.998</b>   |
| 5-methyluridine                                   | 0.100              | 0.993          | 0.050              | <b>0.999</b>   |
| 5-methyl-2-thiouridine                            | 0.100              | 0.990          | 0.050              | <b>0.999</b>   |
| Pseudouridine                                     | 0.010              | <b>0.993</b>   | n/a                | n/a            |
| 1-methylpseudouridine                             | 0.200              | 0.998          | 0.010              | <b>0.999</b>   |
| Inosine                                           | 0.050              | 0.997          | 0.500              | <b>0.999</b>   |
| 2'-O-methylinosine                                | 0.200              | 0.991          | 0.200              | <b>0.997</b>   |

Best linear regression values are highlighted in bold, equal values are underlined.
