# Supplementary material for: Nano LC-MS using capillary columns enables accurate quantification of modified ribonucleosides at low femtomol levels
Source: PubMed Central journal article supplement — RNA. 2018 Oct;24(10):1403–17. doi: 10.1261/rna.065482.117 (PMC6140458; doi:10.1261/rna.065482.117), 2018-10
Supplement: supp_065482.117_Supplemental_Table_4_.pdf [file supp_065482.117_Supplemental_Table_4_.pdf]

**Supplemental Table 4. Divergence from expected non-labeled vs. <sup>15</sup>N-labeled nucleoside isoform distribution in cross-dilution series**

| Isoform divergence (non-labeled: <sup>15</sup> N-labeled) and standard deviation (n=3) determined by manual Xcalibur™ quantification |            |            |            |            |            |             |             |             |             |            |            |            |            |            |
|--------------------------------------------------------------------------------------------------------------------------------------|------------|------------|------------|------------|------------|-------------|-------------|-------------|-------------|------------|------------|------------|------------|------------|
| Nucleoside                                                                                                                           | 100:0      | 99:1       | 90:10      | 80:20      | 70:30      | 60:40       | 50:50       | 40:60       | 30:70       | 20:80      | 10:90      | 1:99       | 0:100      | Average    |
| A                                                                                                                                    | 0.71 ±0.04 | 0.14 ±0.04 | 0.74 ±0.53 | 0.72 ±1.86 | 0.06 ±1.53 | 0.00 ±2.45  | 1.32 ±0.14  | 0.63 ±1.70  | 2.71 ±0.94  | 0.26 ±0.97 | 1.60 ±1.41 | 0.31 ±0.01 | 0.11 ±0.02 | 0.72 ±0.89 |
| C                                                                                                                                    | 0.46 ±0.03 | 0.08 ±0.01 | 0.57 ±0.66 | 0.49 ±0.08 | 0.80 ±1.05 | 0.16 ±0.57  | 1.19 ±0.25  | 0.05 ±1.35  | 0.67 ±0.32  | 0.57 ±1.20 | 0.04 ±0.31 | 0.00 ±0.03 | 0.13 ±0.11 | 0.40 ±0.46 |
| G                                                                                                                                    | 1.99 ±0.07 | 0.42 ±0.03 | 0.44 ±0.35 | 1.50 ±0.81 | 0.13 ±2.02 | 0.74 ±0.77  | 0.40 ±0.47  | 0.57 ±0.78  | 1.89 ±0.85  | 0.57 ±0.98 | 1.09 ±0.12 | 0.25 ±0.13 | 0.20 ±0.07 | 0.78 ±0.57 |
| U                                                                                                                                    | 0.32 ±0.02 | 0.03 ±0.08 | 0.84 ±0.90 | 0.51 ±0.61 | 2.18 ±0.38 | 3.46 ±0.72  | 1.46 ±1.78  | 2.28 ±3.72  | 0.97 ±0.48  | 0.73 ±0.86 | 1.09 ±0.58 | 0.03 ±0.01 | 0.06 ±0.01 | 1.07 ±0.78 |
| m <sup>1</sup> A                                                                                                                     | 0.92 ±0.12 | 0.47 ±0.21 | 0.27 ±0.09 | 1.42 ±0.84 | 1.64 ±0.46 | 2.97 ±0.80  | 2.43 ±0.45  | 3.11 ±0.54  | 3.83 ±0.62  | 0.22 ±0.77 | 2.36 ±0.22 | 0.39 ±0.12 | 0.24 ±0.26 | 1.56 ±0.42 |
| Am                                                                                                                                   | 1.33 ±0.09 | 0.76 ±0.06 | 2.89 ±0.39 | 2.61 ±0.71 | 5.05 ±0.67 | 4.46 ±1.12  | 4.87 ±0.71  | 3.22 ±0.70  | 2.76 ±0.21  | 3.04 ±0.43 | 0.57 ±0.51 | 0.09 ±0.05 | 0.12 ±0.02 | 2.44 ±0.44 |
| m <sup>6</sup> A                                                                                                                     | 0.55 ±0.08 | 0.15 ±0.07 | 0.82 ±1.25 | 0.37 ±2.05 | 2.15 ±0.20 | 0.32 ±5.38  | 2.27 ±0.67  | 0.81 ±0.64  | 0.99 ±2.17  | 0.48 ±0.83 | 0.36 ±0.34 | 0.02 ±0.09 | 0.09 ±0.03 | 0.72 ±1.06 |
| Cm                                                                                                                                   | 0.23 ±0.02 | 0.18 ±0.02 | 2.63 ±1.19 | 5.53 ±1.11 | 5.71 ±0.19 | 8.07 ±1.84  | 6.78 ±1.09  | 8.17 ±2.13  | 7.15 ±0.60  | 5.49 ±1.12 | 2.85 ±1.20 | 0.33 ±0.11 | 0.13 ±0.10 | 4.10 ±0.83 |
| m <sup>3</sup> C                                                                                                                     | 0.31 ±0.07 | 0.46 ±0.32 | 0.71 ±0.77 | 1.10 ±0.92 | 2.56 ±1.17 | 3.17 ±0.46  | 1.70 ±2.62  | 0.54 ±0.63  | 0.66 ±0.17  | 0.53 ±1.55 | 0.11 ±0.42 | 0.12 ±0.15 | 0.50 ±0.70 | 0.96 ±0.77 |
| m <sup>5</sup> C                                                                                                                     | 0.18 ±0.03 | 0.27 ±0.05 | 1.94 ±0.39 | 4.50 ±0.60 | 5.22 ±1.20 | 7.44 ±1.04  | 7.15 ±1.22  | 9.99 ±0.66  | 7.49 ±1.08  | 3.94 ±1.26 | 3.66 ±0.52 | 0.18 ±0.07 | 0.03 ±0.01 | 4.00 ±0.62 |
| m <sup>1</sup> G                                                                                                                     | 4.59 ±1.35 | 2.39 ±0.78 | 4.36 ±3.89 | 5.13 ±1.42 | 5.00 ±1.65 | 12.08 ±8.25 | 5.32 ±2.12  | 3.95 ±5.21  | 3.93 ±2.92  | 3.26 ±0.98 | 2.57 ±0.41 | 0.02 ±0.10 | 0.21 ±0.04 | 3.91 ±2.24 |
| m <sup>2</sup> G                                                                                                                     | 1.35 ±0.15 | 0.45 ±0.05 | 0.47 ±0.45 | 1.87 ±0.38 | 0.55 ±0.61 | 2.90 ±1.98  | 2.74 ±2.21  | 3.07 ±0.47  | 3.89 ±1.22  | 0.27 ±0.57 | 2.10 ±0.28 | 0.37 ±0.17 | 0.28 ±0.07 | 1.56 ±0.66 |
| Gm                                                                                                                                   | 1.21 ±0.15 | 0.45 ±0.09 | 1.12 ±0.61 | 1.62 ±0.43 | 3.38 ±0.19 | 2.78 ±0.20  | 2.76 ±0.83  | 1.92 ±0.44  | 2.25 ±1.72  | 1.85 ±0.94 | 0.18 ±0.19 | 0.06 ±0.06 | 0.10 ±0.01 | 1.51 ±0.45 |
| m <sup>7</sup> G                                                                                                                     | 0.29 ±0.01 | 0.16 ±0.12 | 1.80 ±0.59 | 3.73 ±1.45 | 3.98 ±1.18 | 4.17 ±2.13  | 6.62 ±1.57  | 6.32 ±1.82  | 3.73 ±1.04  | 4.67 ±1.68 | 3.79 ±1.37 | 0.41 ±0.02 | 0.09 ±0.04 | 3.06 ±1.00 |
| m <sup>5</sup> U                                                                                                                     | 0.11 ±0.03 | 0.40 ±0.32 | 0.66 ±0.70 | 1.37 ±1.88 | 1.82 ±1.77 | 3.93 ±1.36  | 3.17 ±1.10  | 3.84 ±0.81  | 3.91 ±1.96  | 1.05 ±0.31 | 1.97 ±0.88 | 0.02 ±0.05 | 0.05 ±0.02 | 1.72 ±0.86 |
| Ψ                                                                                                                                    | 0.52 ±0.26 | 0.00 ±0.02 | 0.35 ±0.19 | 1.13 ±1.23 | 1.58 ±0.63 | 1.61 ±1.69  | 2.23 ±1.10  | 3.47 ±0.68  | 2.50 ±0.42  | 1.18 ±0.40 | 1.28 ±0.49 | 0.00 ±0.10 | 0.11 ±0.03 | 1.23 ±0.56 |
| D                                                                                                                                    | 0.07 ±0.00 | 0.15 ±0.03 | 0.83 ±0.23 | 2.34 ±0.36 | 1.87 ±0.12 | 2.53 ±0.12  | 2.85 ±0.17  | 3.62 ±0.35  | 3.33 ±0.41  | 1.68 ±0.46 | 1.67 ±0.36 | 0.07 ±0.05 | 0.02 ±0.00 | 1.62 ±0.20 |
| I                                                                                                                                    | 0.10 ±0.09 | 0.44 ±0.02 | 4.13 ±0.40 | 7.89 ±0.18 | 9.69 ±1.07 | 13.02 ±0.22 | 13.34 ±0.28 | 14.57 ±0.98 | 13.39 ±0.55 | 8.87 ±0.93 | 5.67 ±0.66 | 0.87 ±0.03 | 0.30 ±0.07 | 7.10 ±0.42 |
| Im                                                                                                                                   | 0.26 ±0.06 | 0.04 ±0.06 | 0.28 ±1.03 | 2.59 ±0.75 | 1.61 ±0.83 | 3.40 ±1.38  | 2.36 ±0.51  | 1.86 ±1.64  | 3.19 ±0.14  | 1.72 ±1.43 | 2.19 ±0.75 | 0.00 ±0.09 | 0.01 ±0.01 | 1.50 ±0.67 |
| Average                                                                                                                              | 0.87 ±0.17 | 0.41 ±0.14 | 1.38 ±0.96 | 2.46 ±0.95 | 2.79 ±0.98 | 4.01 ±1.79  | 3.73 ±1.28  | 3.74 ±1.49  | 3.56 ±1.00  | 2.16 ±1.11 | 1.85 ±0.62 | 0.20 ±0.07 | 0.15 ±0.08 | 2.10 ±0.73 |

  

| Isoform divergence (non-labeled: <sup>15</sup> N-labeled) and standard deviation (n=3) determined by automated pyQms quantification |            |            |            |            |            |             |             |             |             |            |            |            |            |            |
|-------------------------------------------------------------------------------------------------------------------------------------|------------|------------|------------|------------|------------|-------------|-------------|-------------|-------------|------------|------------|------------|------------|------------|
| Nucleoside                                                                                                                          | 100:0      | 99:1       | 90:10      | 80:20      | 70:30      | 60:40       | 50:50       | 40:60       | 30:70       | 20:80      | 10:90      | 1:99       | 0:100      | Average    |
| A                                                                                                                                   | 0.73 ±0.04 | 0.18 ±0.04 | 1.05 ±0.58 | 0.23 ±1.90 | 0.74 ±1.52 | 0.67 ±2.31  | 1.43 ±1.68  | 0.01 ±1.71  | 2.08 ±1.04  | 0.14 ±0.91 | 1.36 ±1.34 | 0.27 ±0.01 | 0.04 ±0.07 | 0.69 ±1.01 |
| C                                                                                                                                   | 1.41 ±0.13 | 0.09 ±0.01 | 0.69 ±0.59 | 0.71 ±0.07 | 1.07 ±1.04 | 0.55 ±0.63  | 1.71 ±0.38  | 0.43 ±1.34  | 0.28 ±0.31  | 0.85 ±1.21 | 0.11 ±0.25 | 0.02 ±0.04 | 0.08 ±0.14 | 0.62 ±0.47 |
| G                                                                                                                                   | 2.04 ±0.07 | 0.46 ±0.02 | 0.67 ±0.36 | 1.14 ±0.81 | 0.68 ±2.05 | 1.07 ±0.61  | 1.12 ±0.45  | 1.08 ±2.21  | 1.02 ±0.99  | 0.57 ±0.74 | 1.09 ±0.09 | 0.25 ±0.14 | 0.20 ±0.16 | 0.88 ±0.67 |
| U                                                                                                                                   | 0.33 ±0.02 | 0.05 ±0.08 | 0.93 ±0.90 | 0.65 ±0.54 | 2.33 ±0.49 | 3.73 ±0.88  | 1.74 ±1.72  | 1.93 ±3.82  | 0.69 ±0.50  | 0.99 ±0.86 | 0.95 ±0.55 | 0.04 ±0.02 | 0.00 ±0.00 | 1.11 ±0.80 |
| m <sup>1</sup> A                                                                                                                    | 2.75 ±0.16 | 0.51 ±0.21 | 0.27 ±0.04 | 1.42 ±0.92 | 1.64 ±0.43 | 2.97 ±0.85  | 2.43 ±0.40  | 3.11 ±0.61  | 3.83 ±0.57  | 0.22 ±0.79 | 2.36 ±0.19 | 0.39 ±0.12 | 0.24 ±0.19 | 1.70 ±0.42 |
| Am                                                                                                                                  | 0.91 ±0.79 | 0.80 ±0.07 | 3.14 ±0.39 | 3.04 ±0.70 | 5.53 ±0.66 | 5.05 ±1.15  | 5.74 ±0.64  | 3.91 ±0.69  | 3.25 ±0.14  | 3.53 ±0.41 | 0.82 ±0.44 | 0.12 ±0.05 | 0.00 ±0.00 | 2.76 ±0.47 |
| m <sup>6</sup> A                                                                                                                    | 0.35 ±0.31 | 0.18 ±0.07 | 1.02 ±1.28 | 0.74 ±2.10 | 2.54 ±0.20 | 0.89 ±5.35  | 3.01 ±0.49  | 1.53 ±0.56  | 1.64 ±2.22  | 0.99 ±0.81 | 0.63 ±0.32 | 0.05 ±0.10 | 0.00 ±0.00 | 1.04 ±1.06 |
| Cm                                                                                                                                  | 0.00 ±0.00 | 0.18 ±1.51 | 2.63 ±1.20 | 5.53 ±1.19 | 5.71 ±0.18 | 8.07 ±1.83  | 6.78 ±0.92  | 8.17 ±2.22  | 7.15 ±0.57  | 5.49 ±1.07 | 2.85 ±1.26 | 0.33 ±0.11 | 0.13 ±0.13 | 4.08 ±0.94 |
| m <sup>3</sup> C                                                                                                                    | 1.14 ±1.02 | 0.48 ±0.31 | 0.89 ±0.72 | 1.47 ±0.89 | 3.02 ±1.27 | 3.64 ±0.30  | 2.10 ±2.51  | 0.15 ±0.68  | 1.02 ±0.02  | 0.71 ±1.59 | 0.05 ±0.42 | 0.11 ±0.15 | 0.59 ±0.60 | 1.18 ±0.81 |
| m <sup>5</sup> C                                                                                                                    | 0.04 ±0.06 | 0.27 ±0.09 | 1.94 ±0.35 | 4.50 ±0.70 | 5.22 ±1.25 | 7.44 ±1.09  | 7.15 ±1.25  | 9.99 ±0.66  | 7.49 ±1.16  | 3.94 ±1.33 | 3.66 ±0.47 | 0.18 ±0.07 | 0.03 ±0.02 | 3.99 ±0.66 |
| m <sup>1</sup> G                                                                                                                    | 1.05 ±1.81 | 0.45 ±1.31 | 1.73 ±7.17 | 5.63 ±1.34 | 5.67 ±1.73 | 12.82 ±8.34 | 6.04 ±2.05  | 4.47 ±5.17  | 4.50 ±2.86  | 3.66 ±0.88 | 0.85 ±0.35 | 0.07 ±0.14 | 0.00 ±0.00 | 3.61 ±2.55 |
| m <sup>2</sup> G                                                                                                                    | 0.88 ±0.77 | 1.00 ±0.00 | 0.47 ±0.46 | 1.87 ±0.35 | 0.55 ±0.60 | 2.90 ±2.71  | 2.74 ±2.08  | 3.07 ±0.38  | 3.89 ±1.87  | 0.27 ±0.59 | 2.10 ±0.27 | 0.37 ±0.87 | 0.28 ±0.00 | 1.57 ±0.84 |
| Gm                                                                                                                                  | 0.81 ±0.72 | 0.04 ±0.83 | 1.42 ±0.66 | 2.17 ±0.49 | 4.05 ±0.29 | 3.46 ±0.41  | 3.54 ±0.82  | 2.56 ±0.49  | 2.87 ±1.62  | 2.30 ±0.90 | 0.43 ±0.24 | 0.68 ±0.55 | 0.00 ±0.00 | 1.87 ±0.62 |
| m <sup>7</sup> G                                                                                                                    | 0.20 ±0.18 | 0.16 ±0.46 | 1.80 ±0.63 | 3.73 ±1.56 | 3.98 ±1.18 | 4.17 ±2.15  | 6.62 ±1.53  | 6.32 ±1.84  | 3.73 ±2.11  | 4.67 ±1.64 | 3.79 ±1.37 | 0.41 ±0.80 | 0.09 ±0.00 | 3.05 ±1.19 |
| m <sup>5</sup> U                                                                                                                    | 0.00 ±0.00 | 0.40 ±0.03 | 0.66 ±0.75 | 1.37 ±1.85 | 1.82 ±1.70 | 3.93 ±1.28  | 3.17 ±1.11  | 3.84 ±0.96  | 3.91 ±1.82  | 1.05 ±0.35 | 1.97 ±0.95 | 0.04 ±0.05 | 0.00 ±0.00 | 1.70 ±0.83 |
| Ψ                                                                                                                                   | 0.53 ±0.26 | 0.02 ±0.02 | 0.35 ±0.26 | 1.13 ±1.27 | 1.58 ±0.65 | 1.61 ±1.68  | 2.23 ±1.25  | 3.47 ±0.82  | 2.50 ±0.45  | 1.18 ±0.35 | 1.28 ±0.49 | 0.00 ±0.10 | 0.11 ±0.00 | 1.23 ±0.58 |
| D                                                                                                                                   | 0.07 ±0.00 | 0.15 ±0.03 | 0.83 ±0.22 | 2.34 ±0.35 | 1.87 ±0.18 | 2.53 ±0.05  | 2.85 ±0.32  | 3.62 ±0.24  | 3.33 ±0.50  | 1.68 ±0.41 | 1.67 ±0.40 | 0.40 ±0.52 | 0.00 ±0.00 | 1.64 ±0.25 |
| I                                                                                                                                   | 0.00 ±0.00 | 0.44 ±0.34 | 4.13 ±0.41 | 7.89 ±0.19 | 9.69 ±1.07 | 13.02 ±0.21 | 13.34 ±0.34 | 14.57 ±0.94 | 13.39 ±0.60 | 8.87 ±0.93 | 5.67 ±0.67 | 0.87 ±0.02 | 0.30 ±0.07 | 7.09 ±0.45 |
| Im                                                                                                                                  | 0.00 ±0.00 | 0.04 ±0.06 | 0.28 ±1.03 | 2.59 ±0.72 | 1.61 ±0.82 | 3.40 ±1.32  | 2.36 ±0.43  | 1.86 ±1.85  | 3.19 ±0.11  | 1.72 ±1.40 | 2.19 ±0.73 | 0.00 ±0.09 | 0.01 ±0.00 | 1.48 ±0.66 |
| Average                                                                                                                             | 0.70 ±0.30 | 0.31 ±0.29 | 1.31 ±0.95 | 2.54 ±0.94 | 3.12 ±0.91 | 4.31 ±1.75  | 4.01 ±1.07  | 3.90 ±1.43  | 3.67 ±1.02  | 2.26 ±0.90 | 1.78 ±0.57 | 0.24 ±0.21 | 0.11 ±0.07 | 2.17 ±0.80 |
